# Supplementary material for: Excited-state E → Z photoisomerization mechanism unveiled by ab initio nonadiabatic molecular dynamics simulation for hemithioindigo–hemistilbene
Source: Royal Society of Chemistry journal article supplement (doi:10.1039/c7cp00102a), 2017-01-01
Supplement: c7cp00102a1.pdf [file c7cp00102a1.pdf]

Supporting information

**Excited-state E→Z photoisomerization mechanism unveiled by *ab initio*  
nonadiabatic molecular dynamics simulation for hemithioindigo-  
hemistilbene**

Meihong Yang<sup>a</sup>, Chunyan Huo<sup>a</sup>, Anyang Li, Yibo Lei<sup>a\*</sup>, Le Yu<sup>a,b\*</sup> and Chaoyuan Zhu<sup>b</sup>

<sup>a</sup> Key Laboratory of Synthetic and Natural Functional Molecule Chemistry of Ministry of Education, College of Chemistry & Materials Science, Shaanxi key Laboratory of Physico-Inorganic Chemistry, Northwest University, Xi'an, Shaanxi, 710127, P. R. China

<sup>b</sup> Institute of Molecular Science, Department of Applied Chemistry, and Center for Interdisciplinary Molecular Science, National Chiao-Tung University, Hsinchu 300, Taiwan

|                                                                                                                                                               |    |
|---------------------------------------------------------------------------------------------------------------------------------------------------------------|----|
| S1. Molecular orbital calculated at CAS(8,8), CAS(10,9) and CAS(14,13).....                                                                                   | 2  |
| S2. Structures for optimized stationary geometries at CAS(8,8)/6-31G*.....                                                                                    | 6  |
| S3. A sample resonance trajectory.....                                                                                                                        | 7  |
| S4. The supplemented sample trajectories for mechanism E-1.....                                                                                               | 8  |
| S5 Key dihedral angles and relative energies for Z-S <sub>0</sub> and E-S <sub>0</sub> calculate at CASSCF(8,8) with 6-31G* and 6-31G*(S,O) respectively..... | 10 |
| S6. Key internal coordinates that involve in photoisomerization processes for optimized geometries at CASSCF(8,8)/6-31G*.....                                 | 11 |
| S7. Cartesian coordinates for interested geometries optimized with CASSCF(8,8)/6-31G*.....                                                                    | 12 |

**S1. Molecular orbitals calculated at SA-2-CAS(8,8), SA-2-CAS(14,13), SA-2-CAS(10,9) and SA-3-CAS(14,13) with 6-31G\*.**

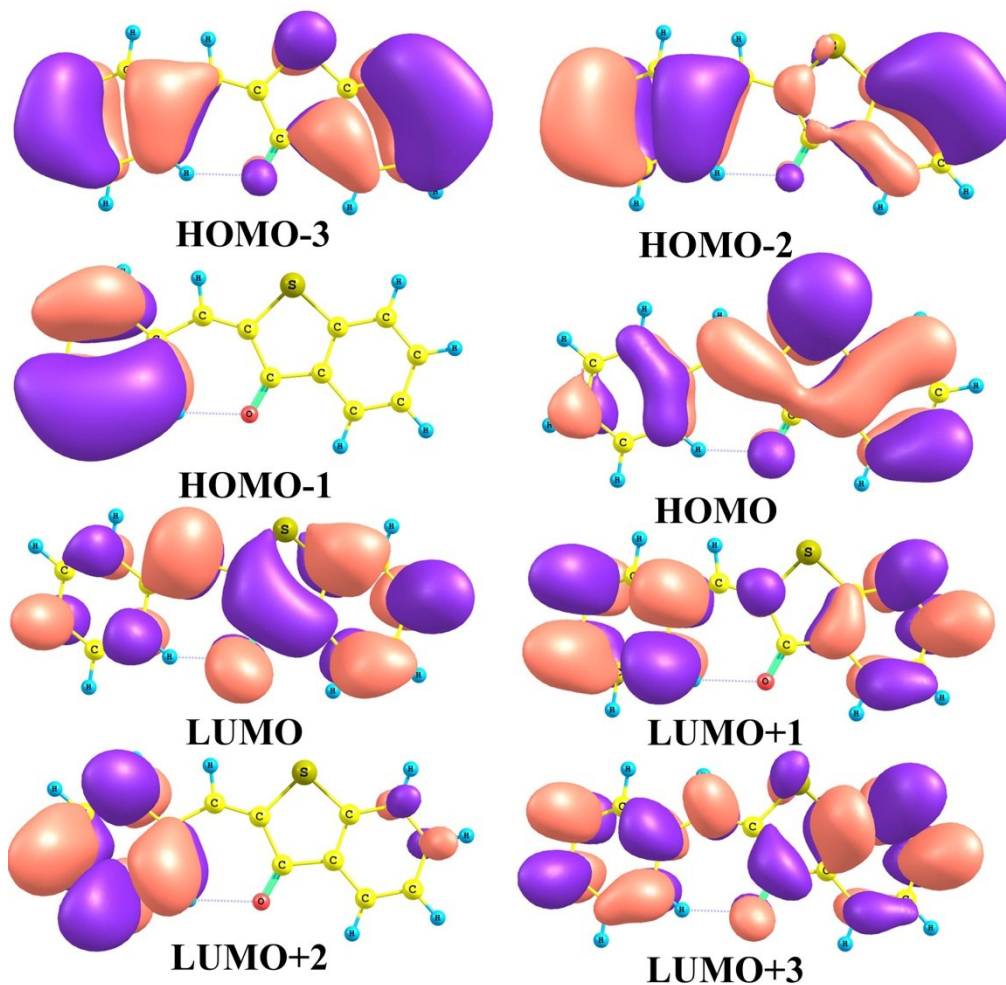

**Figure S1a.** SA-2-CASSCF(8,8)/6-31G\* computed HOMO-3, HOMO-2, HOMO-1, HOMO, LUMO, LUMO+1, LUMO+2 and LUMO+3 of E-HTI.

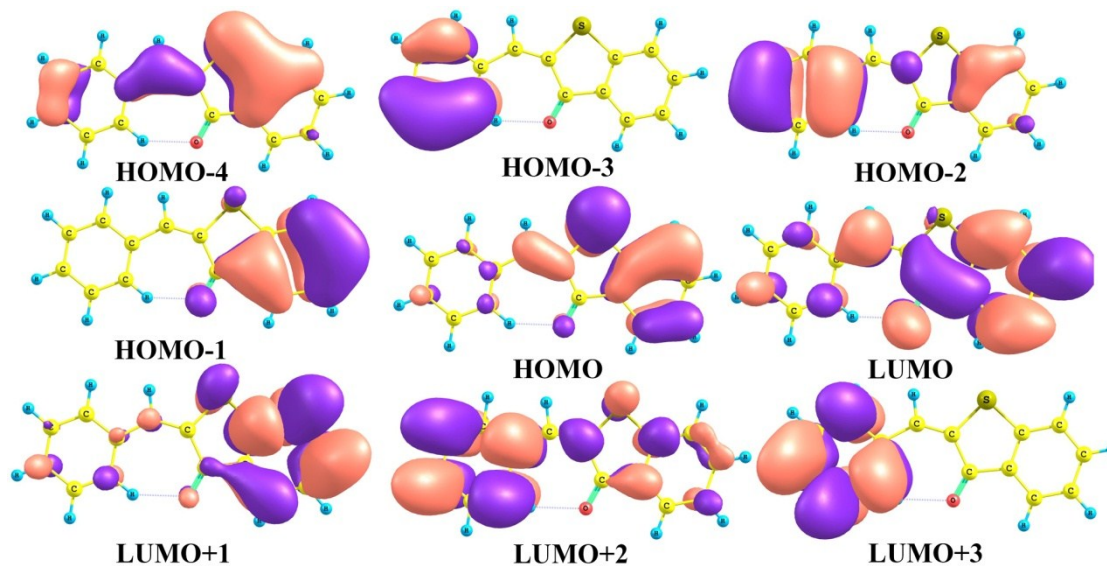

**Figure S1b.** SA-2-CASSCF(10,9)/6-31G\* computed HOMO-4, HOMO-3, HOMO-2, HOMO-1, HOMO, LUMO, LUMO+1, LUMO+2 and LUMO+3 of E-HTI.

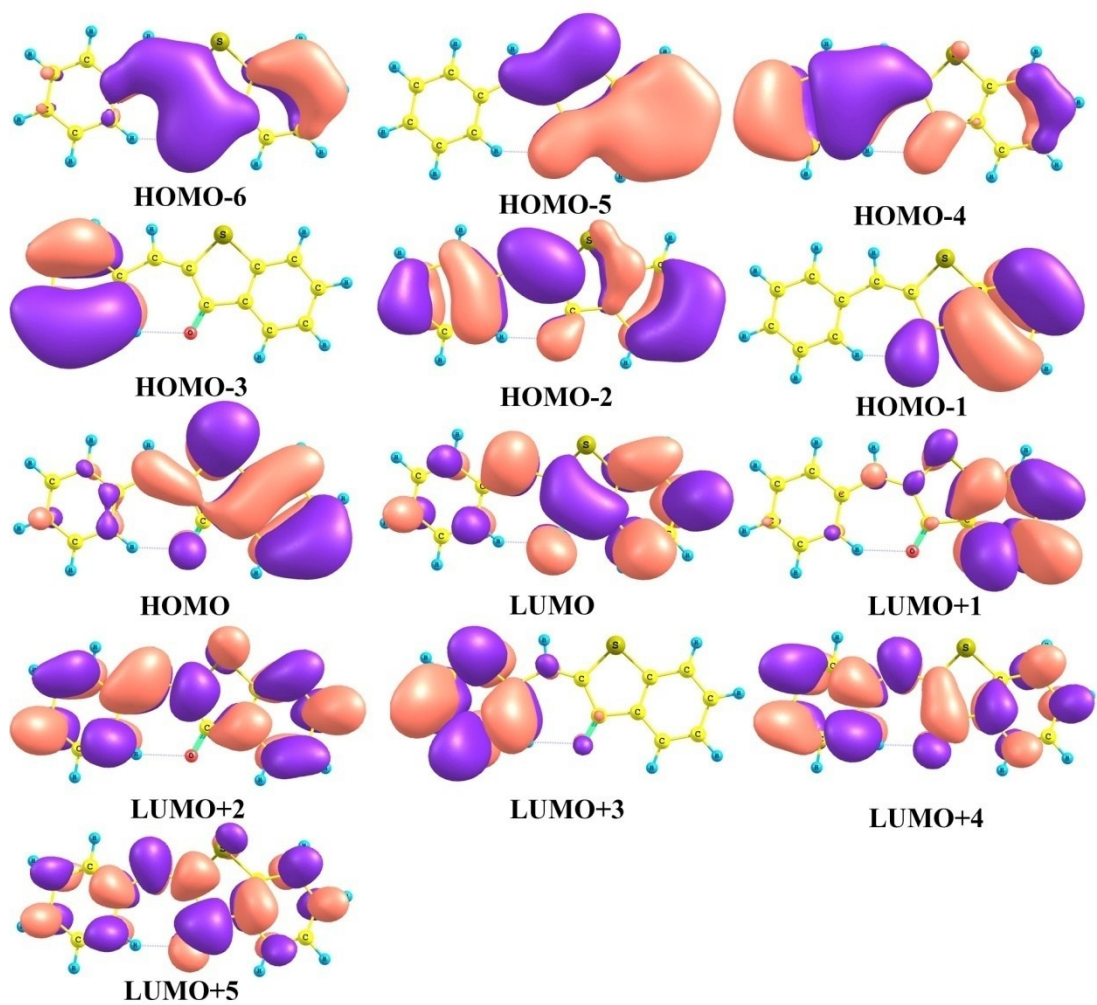

**Figure S1c.** SA-2-CASSCF(14,13)/6-31G\* computed HOMO-6, HOMO-5, HOMO-4, HOMO-3, HOMO-2, HOMO-1, HOMO, LUMO, LUMO+1, LUMO+2, LUMO+3, LUMO+4 and LUMO+5 of E-HTI.

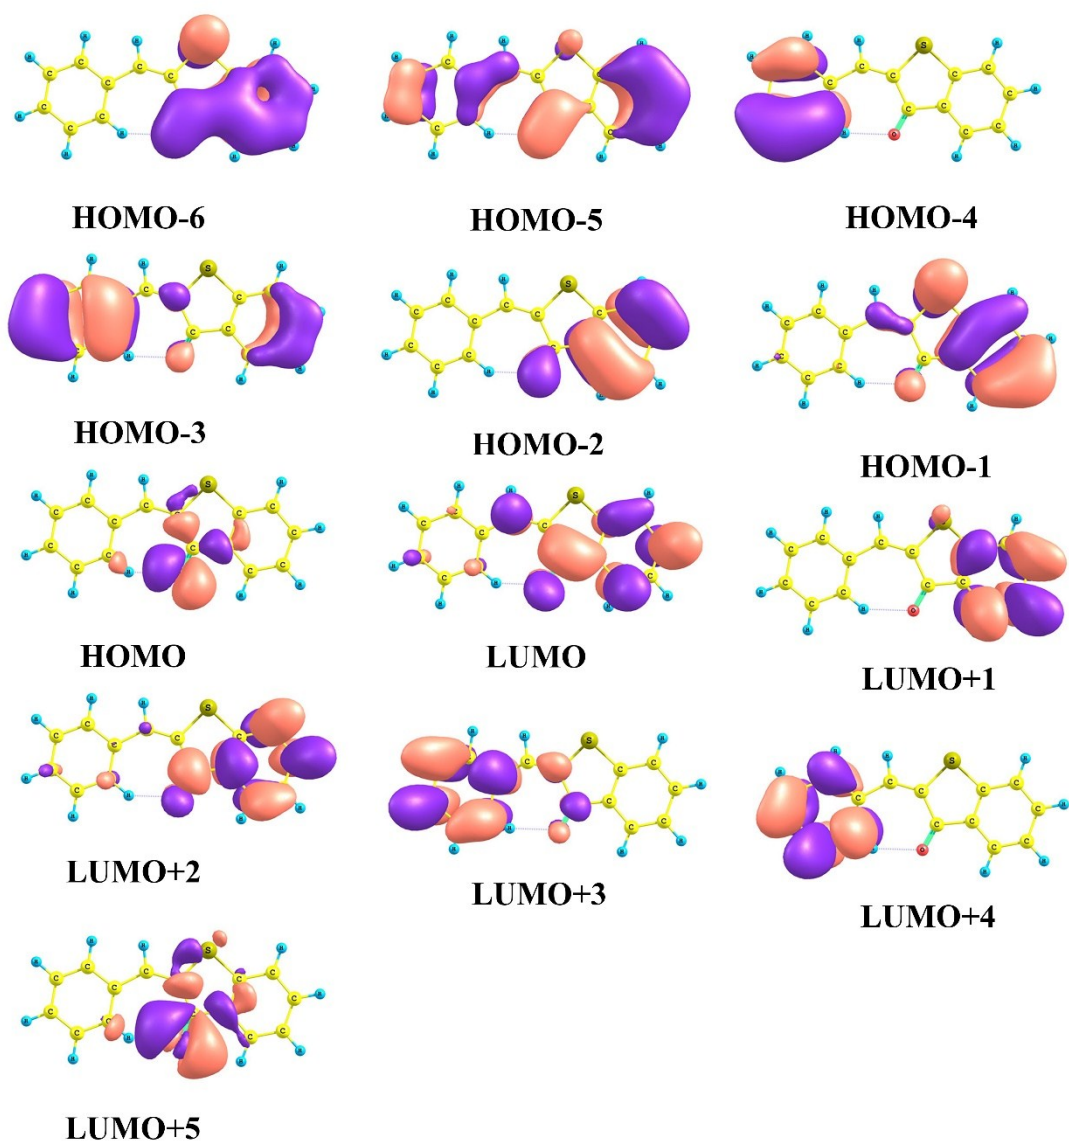

**Figure S1d.** SA-3-CASSCF(14,13)/6-31G\* computed HOMO-6, HOMO-5, HOMO-4, HOMO-3, HOMO-2, HOMO-1, HOMO, LUMO, LUMO+1, LUMO+2, LUMO+3, LUMO+4 and LUMO+5 of E-HTI.

**S2. Structures for optimized stationary geometries at CASSCF(8,8)/6-31G\*.**

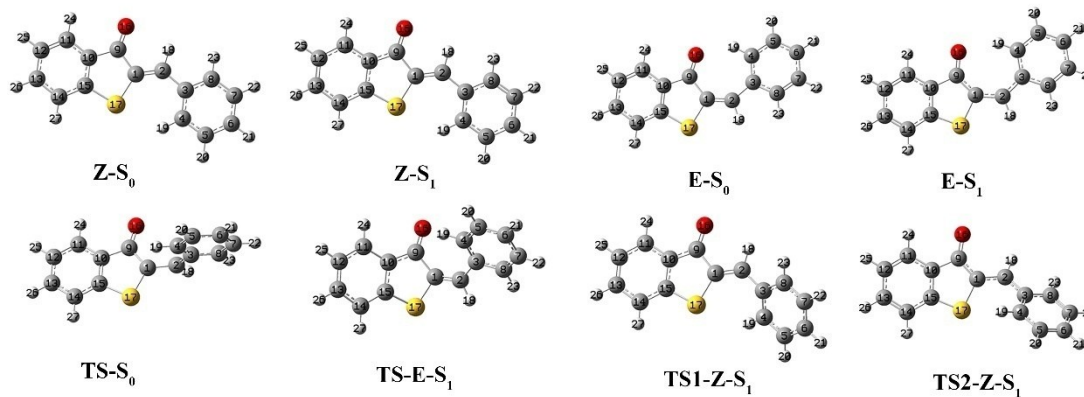

**Figure S2.** Geometries of stationary points optimized at SA-2-CASSCF(8,8)/6-31G\* level.

### S3. A sample resonance trajectory.

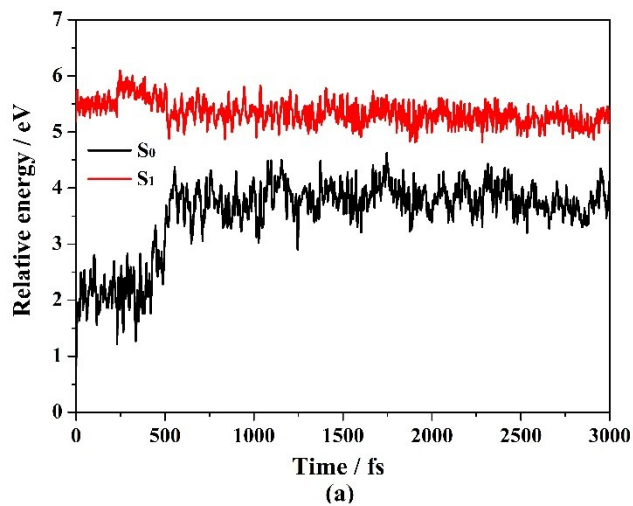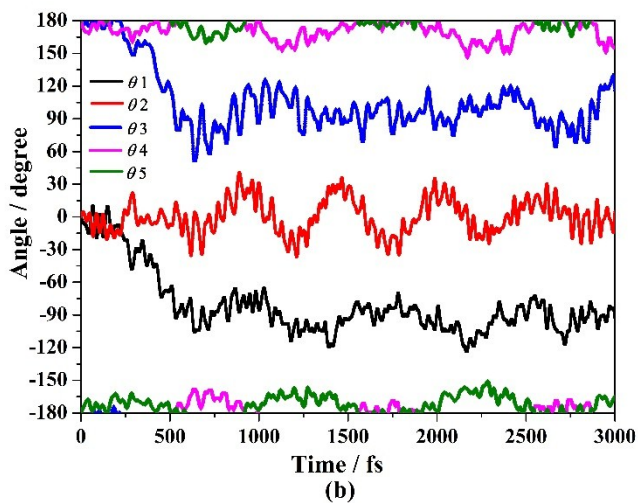

**Figure S3.** Time evolution of potential energies and key dihedral angles along a typical resonance trajectory.

#### S4. The supplemented typical trajectories for mechanism E-1.

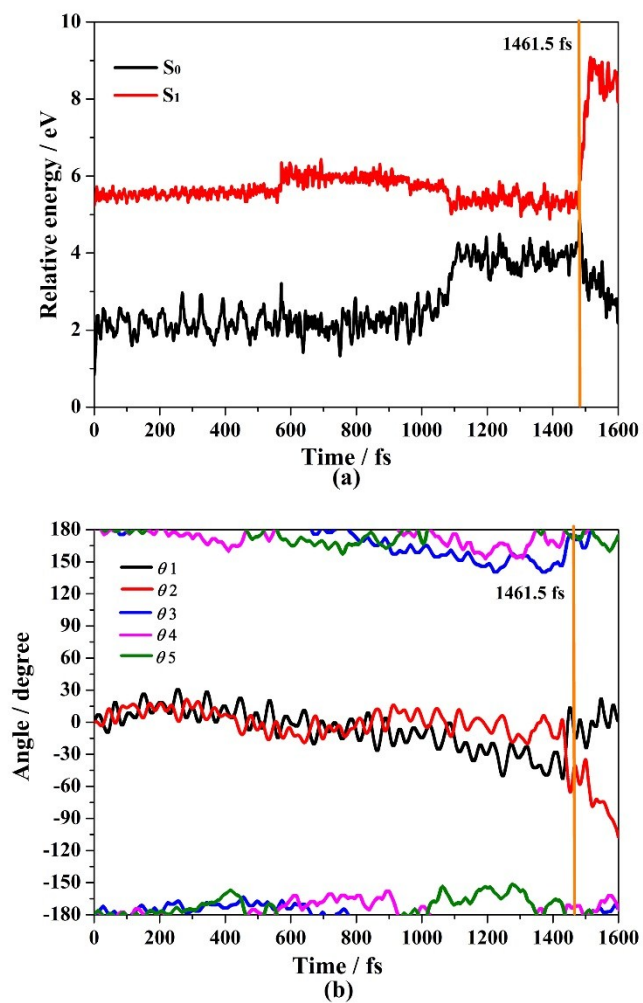

**Figure S4.** Time evolution of dihedral angles ( $\theta_1$ ~ $\theta_5$ ) and potential energies along a nonreactive trajectory of E-1 case 4.



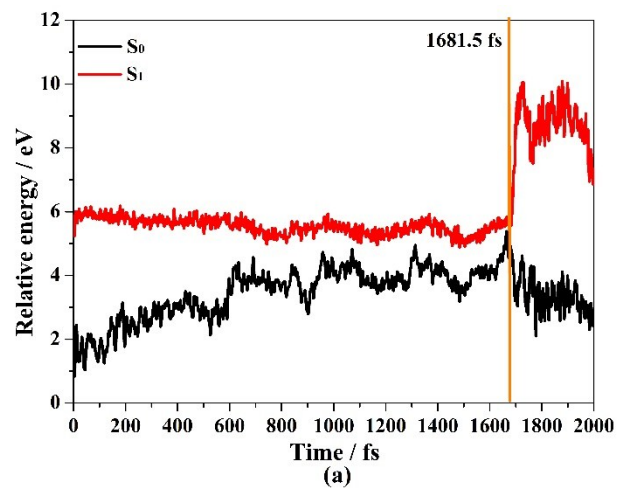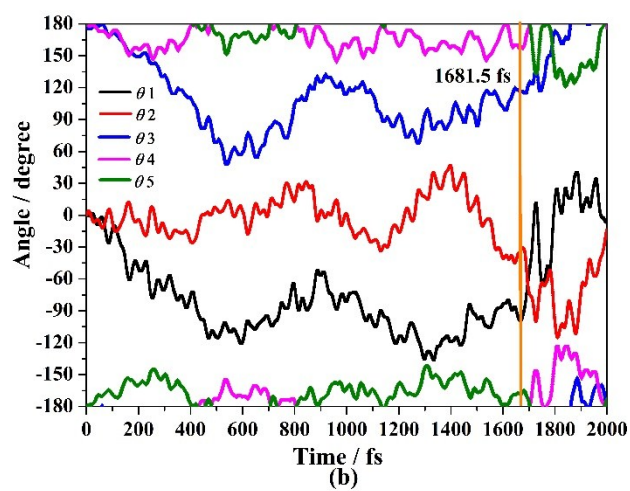

**Figure S5.** Time evolution of dihedral angles ( $\theta_1\sim\theta_5$ ) and potential energies along trajectory in E-1 case 3. An example for symmetrically oscillation towards  $\theta_1$ ,  $\theta_2$  and  $\theta_3$ .

**S5. Key dihedral angles and relative energies for Z-S<sub>0</sub> and E-S<sub>0</sub> calculate at CASSCF(8,8) with 6-31G\* and 6-31G\*(S,O), respectively**

**Table S1.** Key dihedral angles (°) and relative energies (eV) for Z-S<sub>0</sub> and E-S<sub>0</sub> optimized at CASSCF(8,8) with 6-31G\* and 6-31G\*(S,O), respectively.

| geometry                      | $\theta_1$ | $\theta_2$ | $\theta_3$ | $\theta_4$ | $\theta_5$ | CASSCF(S <sub>0</sub> /S <sub>1</sub> ) |
|-------------------------------|------------|------------|------------|------------|------------|-----------------------------------------|
| Z-S <sub>0</sub> -6-31G*      | -179.9     | 0.0        | 0.0        | -179.9     | 179.9      | 0.00/5.67                               |
| Z-S <sub>0</sub> -6-31G*(S,O) | -179.9     | 0.0        | 0.0        | -179.9     | 179.9      | 0.00/4.70                               |
| E-S <sub>0</sub> -6-31G*      | 0.0        | 0.0        | -180.0     | -179.9     | 179.9      | 0.84/5.24                               |
| E-S <sub>0</sub> -6-31G*(S,O) | 0.0        | 0.0        | -180.0     | -179.9     | 179.9      | 0.90/4.32                               |

**S6. Key internal coordinates that involve in photoisomerization processes for optimized geometries at SA-2-CASSCF(8,8)/6-31G\*.**

**Table S2a.** Key parameter for the structures optimized at CASSCF(8,8)/6-31G\*.<sup>a</sup>

| Species    | Z-S <sub>0</sub> | Z-S <sub>1</sub> | E-S <sub>0</sub> | E-S <sub>1</sub> | TS1-Z-S <sub>1</sub> | TS2-Z-S <sub>1</sub> | TS-S <sub>0</sub> |
|------------|------------------|------------------|------------------|------------------|----------------------|----------------------|-------------------|
| $\theta_1$ | -179.9           | -179.9           | 0.0              | 0.0              | 178.7                | 161.5                | 92.6              |
| $\theta_2$ | -0.0             | -0.0             | 0.0              | 0.0              | 33.7                 | -16.9                | -0.9              |
| $\theta_3$ | -0.0             | -0.0             | -180.0           | -179.9           | 1.8                  | -48.6                | -90.2             |
| $\theta_4$ | -179.9           | -179.9           | -179.9           | -179.9           | 176.8                | -160.8               | -177.8            |
| $\theta_5$ | 179.9            | 179.9            | 179.9            | 179.9            | -176.9               | 160.1                | 177.8             |
| $\theta_6$ | 179.9            | 179.9            | -179.9           | -179.9           | -147.5               | 162.9                | 179.0             |
| $\theta_7$ | 179.9            | 179.9            | 179.9            | 179.9            | -179.9               | 178.3                | 179.9             |
| $\theta_8$ | -179.9           | -179.9           | 180.0            | -180.0           | 179.5                | -178.4               | 179.9             |
| $\alpha_1$ | 132.5            | 133.2            | 136.5            | 132.1            | 130.2                | 125.5                | 124.8             |
| $\alpha_2$ | 118.8            | 121.3            | 131.3            | 137.4            | 122.4                | 125.7                | 125.4             |
| $\alpha_3$ | 124.6            | 125.2            | 126.7            | 125.3            | 123.4                | 122.6                | 122.4             |

**Table S2b.** Key parameter for the structures optimized at CASSCF(8,8)/6-31G\*.

| Species    | CI1    | CI2    | CI3    | CI4    | CI5    | CI6    | CI7    |
|------------|--------|--------|--------|--------|--------|--------|--------|
| $\theta_1$ | 42.5   | 34.8   | 92.5   | 87.7   | -110.5 | 152.3  | 37.3   |
| $\theta_2$ | -7.6   | -14.6  | -77.0  | 76.0   | -2.6   | -55.6  | 0.8    |
| $\theta_3$ | -74.0  | -78.0  | -94.6  | -98.6  | 122.6  | -32.4  | -124.7 |
| $\theta_4$ | 131.2  | 123.7  | -174.7 | -177.9 | 133.4  | -172.9 | 165.7  |
| $\theta_5$ | -123.1 | -106.8 | 174.4  | 177.9  | -151.8 | 172.7  | -166.0 |
| $\theta_6$ | -177.4 | 172.8  | 121.3  | -120.6 | 177.7  | 127.4  | -165.7 |
| $\theta_7$ | -170.4 | -174.0 | -127.3 | 132.8  | -178.7 | -177.5 | -162.3 |
| $\theta_8$ | 171.3  | 174.8  | 125.0  | -127.6 | 178.7  | 177.7  | 161.9  |
| $\alpha_1$ | 132.2  | 132.6  | 91.9   | 92.3   | 126.0  | 134.8  | 118.9  |
| $\alpha_2$ | 119.4  | 123.8  | 127.1  | 122.5  | 98.9   | 123.2  | 118.5  |
| $\alpha_3$ | 123.3  | 123.0  | 125.2  | 125.7  | 120.0  | 119.7  | 121.1  |

<sup>a</sup> In table,  $\alpha_1$ =C1C2C3,  $\alpha_2$ =C9C1C2 and  $\alpha_3$ =C2C3C4.

### S7. Cartesian coordinates for interested geometries optimized by SA-2-CASSCF(8,8) with 6-31G\*.

#### Z-S<sub>0</sub>

|   |               |               |               |
|---|---------------|---------------|---------------|
| C | 0.4244002780  | -0.0002814662 | -0.0187641646 |
| C | 0.9426588959  | -0.0004023274 | -1.2434783519 |
| C | 0.3332559456  | -0.0002327432 | -2.5820080602 |
| C | -1.0493433281 | -0.0010532131 | -2.8311562660 |
| C | -1.5288276877 | -0.0007891718 | -4.1346850959 |
| C | -0.6435887316 | 0.0002800490  | -5.2131329214 |
| C | 0.7259658105  | 0.0010820231  | -4.9736783916 |
| C | 1.1993425373  | 0.0007811955  | -3.6685139289 |
| C | 1.3553010415  | -0.0004680767 | 1.1618956153  |
| C | 0.5772180026  | -0.0001561211 | 2.4297092057  |
| C | 1.1221319883  | -0.0002129616 | 3.7079760231  |
| C | 0.2819602584  | 0.0001084870  | 4.7897199094  |
| C | -1.1202989831 | 0.0004871310  | 4.5974041668  |
| C | -1.6744243311 | 0.0005456392  | 3.3168120005  |
| C | -0.7983922348 | 0.0002152287  | 2.2244182592  |
| O | 2.5443481123  | -0.0008140156 | 1.0873949714  |
| S | -1.2754638301 | 0.0002106680  | 0.5019190540  |
| H | 2.0190646505  | -0.0005878304 | -1.2464204493 |
| H | -1.7540983779 | -0.0020139372 | -2.0247518445 |
| H | -2.5897036907 | -0.0014168783 | -4.3087765746 |
| H | -1.0181255839 | 0.0004278819  | -6.2208450040 |
| H | 1.4206901626  | 0.0019361817  | -5.7939184387 |
| H | 2.2608878403  | 0.0013393182  | -3.4948852493 |
| H | 2.1904816344  | -0.0005045517 | 3.8229606710  |
| H | 0.6778941751  | 0.0000720708  | 5.7885577776  |
| H | -1.7705900365 | 0.0007369262  | 5.4531708592  |
| H | -2.7396676364 | 0.0008339937  | 3.1790283128  |

#### Z-S<sub>1</sub>

|   |               |               |               |
|---|---------------|---------------|---------------|
| C | 0.5003703813  | -0.0004175496 | -0.0168474358 |
| C | 0.9777564584  | -0.0005830720 | -1.2572170499 |
| C | 0.3405517496  | -0.0003238287 | -2.5812101350 |
| C | -1.0441540135 | -0.0013567365 | -2.8132891574 |
| C | -1.5458640658 | -0.0009875167 | -4.1109857480 |
| C | -0.6808795522 | 0.0004246047  | -5.2024330160 |
| C | 0.6942162691  | 0.0013662589  | -4.9808256749 |
| C | 1.1881116162  | 0.0009849711  | -3.6915945482 |
| C | 1.4195739139  | -0.0006739772 | 1.1751752511  |

|   |               |               |               |
|---|---------------|---------------|---------------|
| C | 0.6589758416  | -0.0002545366 | 2.3721976813  |
| C | 1.1294938014  | -0.0002970673 | 3.7220049736  |
| C | 0.1876445029  | 0.0001753282  | 4.8077318610  |
| C | -1.1521741125 | 0.0006722197  | 4.6149943183  |
| C | -1.6860983353 | 0.0007565707  | 3.2880338967  |
| C | -0.7637079465 | 0.0002915972  | 2.1833714576  |
| O | 2.6324266391  | -0.0011514514 | 1.0845594295  |
| S | -1.1957227593 | 0.0003118594  | 0.5315613306  |
| H | 2.0540070709  | -0.0008622221 | -1.2754377014 |
| H | -1.7415401913 | -0.0025951550 | -1.9997120847 |
| H | -2.6098700728 | -0.0018281907 | -4.2666253708 |
| H | -1.0702762784 | 0.0007426384  | -6.2044328035 |
| H | 1.3752408197  | 0.0023839937  | -5.8128534923 |
| H | 2.2522957592  | 0.0017288587  | -3.5355231572 |
| H | 2.1846250816  | -0.0006730579 | 3.9097380928  |
| H | 0.5794704054  | 0.0001182131  | 5.8086536815  |
| H | -1.8282194489 | 0.0010162713  | 5.4488957865  |
| H | -2.7431766523 | 0.0011544760  | 3.1080216996  |

### E-S<sub>0</sub>

|   |               |               |               |
|---|---------------|---------------|---------------|
| C | -0.6060501813 | -0.0000661216 | 0.0172182266  |
| C | -0.9892443603 | -0.0000657343 | -1.2608829273 |
| C | -0.3250612919 | -0.0000336633 | -2.5763739094 |
| C | 1.0584603646  | -0.0002231481 | -2.8189366034 |
| C | 1.5361248045  | -0.0001794378 | -4.1260257969 |
| C | 0.6580897394  | 0.0000236409  | -5.2067598646 |
| C | -0.7147874684 | 0.0002361950  | -4.9723224448 |
| C | -1.189990331  | 0.0001773522  | -3.6782839972 |
| C | 0.7718687969  | 0.0000043224  | 0.6512544049  |
| C | 0.6440727905  | 0.0000277840  | 2.1060999264  |
| C | 1.7212897022  | 0.0000979438  | 3.0111747355  |
| C | 1.4722069987  | 0.0001064435  | 4.3532787875  |
| C | 0.1391751270  | 0.0000437676  | 4.8237414400  |
| C | -0.9309276324 | -0.0000261796 | 3.9424242257  |
| C | -0.6591043222 | -0.0000328819 | 2.5638809689  |
| O | 1.8093422503  | 0.0000401267  | 0.0549911879  |
| S | -1.8547827070 | -0.0001165434 | 1.2879999586  |
| H | -2.0605880067 | -0.0000840586 | -1.3796542230 |
| H | 1.7436363927  | -0.0003931713 | -2.0011970944 |
| H | 2.5976249219  | -0.0003039055 | -4.2964857963 |
| H | 1.0354324589  | 0.0000149614  | -6.2134441588 |

|   |               |               |               |
|---|---------------|---------------|---------------|
| H | -1.4056122560 | 0.0004408575  | -5.7960100100 |
| H | -2.2532290712 | 0.0003000944  | -3.5146863382 |
| H | 2.7241759528  | 0.0001435755  | 2.6259797465  |
| H | 2.2832225378  | 0.0001598381  | 5.0581038283  |
| H | -0.0489595055 | 0.0000502818  | 5.8820718556  |
| H | -1.9429150155 | -0.0000739287 | 4.3029071395  |

### E-S<sub>1</sub>

|   |               |               |               |
|---|---------------|---------------|---------------|
| C | -0.4514429319 | 0.0000268535  | 0.0144955750  |
| C | -0.9876572788 | 0.0000588100  | -1.2895541310 |
| C | -0.3726095127 | 0.0000246972  | -2.5814247938 |
| C | 1.0215778515  | -0.0001359916 | -2.8243122713 |
| C | 1.5082215703  | -0.0001687290 | -4.1280463856 |
| C | 0.6425277413  | -0.0000515463 | -5.2201210949 |
| C | -0.7395454349 | 0.0001124223  | -4.9900421989 |
| C | -1.2286259563 | 0.0001428213  | -3.7123347542 |
| C | 0.8306084978  | 0.0000746747  | 0.6136536307  |
| C | 0.6777803331  | 0.0000384409  | 2.1060066904  |
| C | 1.7251082955  | 0.0000700551  | 3.0218520476  |
| C | 1.4331531203  | 0.0000374160  | 4.3642749459  |
| C | 0.0922833977  | -0.0000258828 | 4.8424461645  |
| C | -0.9549065119 | -0.0000556427 | 3.9541265680  |
| C | -0.6406119834 | -0.0000201504 | 2.5691394547  |
| O | 1.9496325486  | 0.0001430925  | 0.1202500107  |
| S | -1.7102691253 | -0.0000437973 | 1.2760737685  |
| H | -2.0636311486 | 0.0001286042  | -1.3315523088 |
| H | 1.7000769849  | -0.0002184966 | -1.9962763930 |
| H | 2.5721128086  | -0.0002857408 | -4.2887602746 |
| H | 1.0266931519  | -0.0000874043 | -6.2242787865 |
| H | -1.4217185391 | 0.0002146471  | -5.8223292540 |
| H | -2.2943602130 | 0.0002637216  | -3.5576128542 |
| H | 2.7342492290  | 0.0001185371  | 2.6574728325  |
| H | 2.2338460559  | 0.0000591839  | 5.0813378864  |
| H | -0.0925654810 | -0.0000499237 | 5.9000107536  |
| H | -1.9764654828 | -0.0001022612 | 4.2855684398  |

### TS1-Z-S<sub>1</sub>

|   |              |              |               |
|---|--------------|--------------|---------------|
| C | 0.1194000684 | 0.2878749740 | 0.0659420759  |
| C | 1.2609740470 | 0.4000576466 | -0.6003715788 |
| C | 1.5375828775 | 0.2813828442 | -2.0432880924 |
| C | 0.6431802042 | 0.6796320934 | -3.0309841481 |

|   |               |               |               |
|---|---------------|---------------|---------------|
| C | 0.9569271020  | 0.5433970614  | -4.3741168344 |
| C | 2.1817443250  | 0.0072074069  | -4.7601758691 |
| C | 3.0978485709  | -0.3798551963 | -3.7830399597 |
| C | 2.7814232555  | -0.2351605400 | -2.4378065560 |
| C | 0.0415454475  | 0.4174598130  | 1.5629555770  |
| C | -1.2870997971 | 0.1834363806  | 1.9965336068  |
| C | -1.7988557361 | 0.1952626201  | 3.3301653502  |
| C | -3.1927110168 | -0.0668224140 | 3.5647872735  |
| C | -4.0654023164 | -0.3345461717 | 2.5657398296  |
| C | -3.6133786446 | -0.3660459283 | 1.2085309929  |
| C | -2.2230949468 | -0.1068721900 | 0.9476417328  |
| O | 1.0039562572  | 0.6764849651  | 2.2611192203  |
| S | -1.4926028138 | -0.0981372647 | -0.5946191399 |
| H | 2.1129052630  | 0.5736925853  | 0.0348340379  |
| H | -0.2935533747 | 1.1298875672  | -2.7599904296 |
| H | 0.2508380839  | 0.8642438309  | -5.1189193690 |
| H | 2.4229841941  | -0.0976618952 | -5.8025748247 |
| H | 4.0517307029  | -0.7867354180 | -4.0671608166 |
| H | 3.4916447211  | -0.5305446463 | -1.6860793970 |
| H | -1.1339040849 | 0.4003012023  | 4.1452815714  |
| H | -3.5404574568 | -0.0460374324 | 4.5816720862  |
| H | -5.1007201921 | -0.5259799828 | 2.7752345845  |
| H | -4.2833395700 | -0.5779021714 | 0.3984939265  |

### TS2-Z-S<sub>1</sub>

|   |               |               |               |
|---|---------------|---------------|---------------|
| C | -0.0336061253 | 0.6537525942  | 0.0635019270  |
| C | 1.2639919411  | 1.1450056575  | -0.3109721705 |
| C | 2.5159911261  | 0.4635632387  | -0.0865096683 |
| C | 2.6475868061  | -0.5814901451 | 0.8143398790  |
| C | 3.8736569347  | -1.2420747295 | 0.9805124205  |
| C | 4.9735695040  | -0.8598405912 | 0.2632581637  |
| C | 4.8723169107  | 0.2164593138  | -0.6426116265 |
| C | 3.6733031922  | 0.8662275222  | -0.8114342949 |
| C | -1.2020643179 | 1.4284162393  | 0.1898719675  |
| C | -2.3919262701 | 0.5329736810  | 0.1130874367  |
| C | -3.7289613131 | 0.9243672569  | 0.2956209315  |
| C | -4.7123443199 | -0.0072083456 | 0.1549889507  |
| C | -4.4182349972 | -1.3716088895 | -0.1774182918 |
| C | -3.1276277022 | -1.7716690137 | -0.3674639769 |
| C | -2.1011351354 | -0.7883687232 | -0.2141053513 |
| O | -1.3141384769 | 2.6435399851  | 0.3392196436  |

|   |               |               |               |
|---|---------------|---------------|---------------|
| S | -0.4449673781 | -1.0204171204 | -0.3774915147 |
| H | 1.2915365088  | 2.1372526253  | -0.7242678679 |
| H | 1.8148842087  | -0.8596015704 | 1.4335477500  |
| H | 3.9443632912  | -2.0462697355 | 1.6913613817  |
| H | 5.9139777432  | -1.3640216734 | 0.3949553760  |
| H | 5.7366213021  | 0.5285525064  | -1.2011056860 |
| H | 3.5948006951  | 1.6848863319  | -1.5046133468 |
| H | -3.9366921222 | 1.9499108391  | 0.5331076411  |
| H | -5.7408774393 | 0.2759234843  | 0.2879261294  |
| H | -5.2253120285 | -2.0725802650 | -0.2806440025 |
| H | -2.8799795376 | -2.7856494727 | -0.6206228000 |

**TS-S<sub>0</sub>**

|   |               |               |               |
|---|---------------|---------------|---------------|
| C | -0.0083177217 | -0.0691963343 | -0.7698178203 |
| C | 1.3605238887  | 0.0005306703  | -1.2479577528 |
| C | 2.5312389427  | -0.0084618314 | -0.4024385836 |
| C | 2.4499091955  | -0.0683166870 | 0.9934661995  |
| C | 3.5957301942  | -0.0754017936 | 1.7663656875  |
| C | 4.8458804666  | -0.0226932047 | 1.1697322200  |
| C | 4.9436490912  | 0.0378270241  | -0.2129516930 |
| C | 3.8024917319  | 0.0445759364  | -0.9892580303 |
| C | -0.8607844634 | 1.0764375748  | -0.4796176953 |
| C | -2.2087489215 | 0.6241555262  | -0.0620971229 |
| C | -3.2818252324 | 1.4404809239  | 0.2978343500  |
| C | -4.4819238181 | 0.8464026245  | 0.6640679702  |
| C | -4.6040769125 | -0.5495115679 | 0.6689292458  |
| C | -3.5333827946 | -1.3604410685 | 0.3096341967  |
| C | -2.3380951015 | -0.7478647301 | -0.0548866936 |
| O | -0.5035829037 | 2.2392604797  | -0.5738219153 |
| S | -0.8523696361 | -1.5844818344 | -0.5465630271 |
| H | 1.5122104931  | 0.0486958178  | -2.3117556155 |
| H | 1.4892844426  | -0.1086921313 | 1.4716313469  |
| H | 3.5130262068  | -0.1211011040 | 2.8374960075  |
| H | 5.7344428198  | -0.0278807178 | 1.7748412495  |
| H | 5.9095971305  | 0.0800501138  | -0.6835490163 |
| H | 3.8859673006  | 0.0928970651  | -2.0606660370 |
| H | -3.1644315404 | 2.5081271261  | 0.2862632613  |
| H | -5.3213358126 | 1.4559089032  | 0.9450314873  |
| H | -5.5368908263 | -1.0018005174 | 0.9536029900  |
| H | -3.6287482190 | -2.4307762637 | 0.3136657905  |



**TS-E-S<sub>1</sub>**

|   |               |               |               |
|---|---------------|---------------|---------------|
| C | -0.4909090438 | 0.9859406489  | 2.4562795780  |
| C | -1.3574613055 | 0.7279146714  | 3.4333519454  |
| C | -2.8402932517 | 0.7214357075  | 3.4421673266  |
| C | -3.6053547424 | 0.6737216931  | 2.2682847304  |
| C | -4.9550657167 | 0.4062621418  | 2.3128232782  |
| C | -5.6011131750 | 0.1852156078  | 3.5322245070  |
| C | -4.8671257238 | 0.2493808899  | 4.7130623512  |
| C | -3.4963677946 | 0.5094784826  | 4.6666956316  |
| C | -0.7108729925 | 1.5331482482  | 1.0666114385  |
| C | 0.1704776632  | 0.8678354098  | 0.1837400321  |
| C | 0.0780439428  | 0.7498140179  | -1.2914205084 |
| C | 0.8562356075  | -0.2275423973 | -1.9782754765 |
| C | 1.6889819688  | -1.0867707143 | -1.3412941819 |
| C | 1.8766339931  | -1.0078885231 | 0.0771554622  |
| C | 1.1431652943  | 0.0118227075  | 0.8207896037  |
| O | -1.5422281927 | 2.3469723597  | 0.7580834140  |
| S | 1.1719758375  | 0.2897377963  | 2.5212523432  |
| H | -0.9384507705 | 0.2989728777  | 4.3286094298  |
| H | -3.1398734694 | 0.8321007845  | 1.3164058795  |
| H | -5.5076155479 | 0.3509086867  | 1.3904904858  |
| H | -6.6515296838 | -0.0495415630 | 3.5543164788  |
| H | -5.3496658571 | 0.0721260927  | 5.6607351530  |
| H | -2.9335698118 | 0.5187070769  | 5.5850696648  |
| H | -0.5406050294 | 1.4528449208  | -1.8028043350 |
| H | 0.7935868292  | -0.2317286192 | -3.0206926721 |
| H | 2.2472395335  | -1.8065816849 | -1.8871122828 |
| H | 2.5162546386  | -1.6919971097 | 0.5997409725  |

**CI1**

|   |               |               |               |
|---|---------------|---------------|---------------|
| C | -1.6328408974 | 0.2162208619  | -0.1195885374 |
| C | -1.4604670221 | 0.3386408154  | 1.2939160335  |
| C | -0.3382358239 | 0.1356738075  | 2.1408393437  |
| C | 0.8989646153  | -0.4202118100 | 1.6865080719  |
| C | 1.8553111308  | -0.7625066270 | 2.6013707128  |
| C | 1.6059052145  | -0.5693771121 | 3.9833094526  |
| C | 0.4223025538  | -0.0477132674 | 4.4392611327  |
| C | -0.5552246210 | 0.2994803427  | 3.5075490937  |
| C | -1.0648797451 | -0.8853024131 | -0.7955833271 |
| C | -0.1458627122 | -0.4177205226 | -1.8875072722 |
| C | 0.4165866799  | -1.2245770799 | -2.8840447530 |

|   |               |               |               |
|---|---------------|---------------|---------------|
| C | 1.3300352230  | -0.6670816560 | -3.7646528951 |
| C | 1.6921681550  | 0.6876720227  | -3.6488187575 |
| C | 1.1464293292  | 1.4847213161  | -2.6547346228 |
| C | 0.2350404970  | 0.8943499508  | -1.7658861364 |
| O | -1.1658388421 | -2.0748933393 | -0.5196439623 |
| S | -0.7233246757 | 1.7388287903  | -0.5445629190 |
| H | -2.3240626256 | 0.6260999845  | 1.8935424302  |
| H | 1.0606730163  | -0.5699789982 | 0.6402800885  |
| H | 2.7882914263  | -1.1888053443 | 2.2863980080  |
| H | 2.3655411915  | -0.8486439499 | 4.6911903331  |
| H | 0.2469266759  | 0.0855221557  | 5.4895140909  |
| H | -1.4927960593 | 0.6985506296  | 3.8494363246  |
| H | 0.1267519000  | -2.2569185239 | -2.9430102743 |
| H | 1.7695036270  | -1.2679745316 | -4.5407849601 |
| H | 2.4056916563  | 1.1088925571  | -4.3348222369 |
| H | 1.4173441328  | 2.5210239403  | -2.5648334628 |

## CI2

|   |               |               |               |
|---|---------------|---------------|---------------|
| C | -1.8475750822 | 0.0569525373  | -0.1339127083 |
| C | -1.5711295011 | 0.2471711814  | 1.2627416723  |
| C | -0.3733903997 | 0.0520820815  | 2.0673220777  |
| C | 0.7386647602  | -0.6760399359 | 1.6183769494  |
| C | 1.7895711822  | -0.9271753839 | 2.4732958246  |
| C | 1.7489526732  | -0.4665009164 | 3.7845967928  |
| C | 0.6496603796  | 0.2382018877  | 4.2507155699  |
| C | -0.4077150702 | 0.4847491520  | 3.3982219538  |
| C | -1.2622493151 | -1.0028360162 | -0.9369604764 |
| C | -0.2178221217 | -0.4609665918 | -1.8769367612 |
| C | 0.4539470324  | -1.1933676872 | -2.8548249113 |
| C | 1.4676359270  | -0.5770786914 | -3.5793990298 |
| C | 1.8078574435  | 0.7594106956  | -3.3287677756 |
| C | 1.1375834932  | 1.4901086562  | -2.3538146907 |
| C | 0.1335486484  | 0.8474430657  | -1.6312250256 |
| O | -1.4538645355 | -2.1959827116 | -0.8211111573 |
| S | -1.0103097323 | 1.5985574833  | -0.4943402812 |
| H | -2.3945614076 | 0.5732969500  | 1.8920239244  |
| H | 0.7667411105  | -1.0562776225 | 0.6185060636  |
| H | 2.6364892144  | -1.4906736231 | 2.1281122155  |
| H | 2.5715978365  | -0.6705217746 | 4.4460760313  |
| H | 0.6176358342  | 0.5839430322  | 5.2673454474  |
| H | -1.2672941502 | 1.0226653850  | 3.7568250774  |

|   |              |               |               |
|---|--------------|---------------|---------------|
| H | 0.1814334481 | -2.2178573588 | -3.0272726623 |
| H | 1.9990140073 | -1.1269452520 | -4.3351893646 |
| H | 2.5972074566 | 1.2239090269  | -3.8921592718 |
| H | 1.3883048683 | 2.5177044306  | -2.1636044841 |

### CI3

|   |               |               |               |
|---|---------------|---------------|---------------|
| C | 1.6306666906  | -0.0890565393 | 1.1646005173  |
| C | 0.1691286039  | -0.0303488123 | 1.0041557711  |
| C | 0.2771656055  | 0.0284184413  | -0.3962738831 |
| C | 0.6617304248  | 1.2501818980  | -1.1887445671 |
| C | -0.1580036323 | 1.5967297135  | -2.1680146885 |
| C | -1.2745030799 | 0.7334742221  | -2.5560221148 |
| C | -1.2493579946 | -0.6609323026 | -2.1553919014 |
| C | -0.3957006326 | -1.0462447834 | -1.2158954828 |
| C | 2.5491236696  | 1.0443107990  | 1.3662501287  |
| C | 3.9183859102  | 0.5407757736  | 1.6147105990  |
| C | 5.0437587462  | 1.3413024996  | 1.8444677990  |
| C | 6.2643141456  | 0.7285366472  | 2.0736346144  |
| C | 6.3564714679  | -0.6734894795 | 2.0750260173  |
| C | 5.2391583114  | -1.4648085163 | 1.8493916107  |
| C | 4.0153400026  | -0.8308459336 | 1.6161305993  |
| O | 2.2298305380  | 2.2007976455  | 1.3184808533  |
| S | 2.4768346864  | -1.6489981754 | 1.3205366064  |
| H | -0.4211006731 | -0.8191127070 | 1.4408361439  |
| H | 1.5018608910  | 1.8509000955  | -0.9101295738 |
| H | 0.0004254400  | 2.5054023344  | -2.7208090299 |
| H | -2.0154417912 | 1.0877288316  | -3.2456207421 |
| H | -1.8760708519 | -1.3658600023 | -2.6739529661 |
| H | -0.2440546122 | -2.0746513178 | -0.9474164127 |
| H | 4.9386477585  | 2.4100450470  | 1.8403919906  |
| H | 7.1431707955  | 1.3206339291  | 2.2524519537  |
| H | 7.3071451995  | -1.1430111469 | 2.2536153531  |
| H | 5.3138813813  | -2.5366921611 | 1.8524168049  |

### CI4

|   |               |               |               |
|---|---------------|---------------|---------------|
| C | 0.9496703289  | 0.0646702514  | -0.1552225538 |
| C | 1.5446960683  | -0.0617282533 | -1.4833614037 |
| C | 0.2820305373  | -0.0408690595 | -2.1155290213 |
| C | -0.5667519714 | 1.1694966225  | -2.3305631941 |
| C | -1.0815373235 | 1.3411395566  | -3.5376086961 |
| C | -0.9441119492 | 0.3168181426  | -4.5925533360 |

|   |               |               |               |
|---|---------------|---------------|---------------|
| C | -0.5255460989 | -0.9814406848 | -4.2438599321 |
| C | -0.1039722985 | -1.2254094974 | -2.9512282867 |
| C | 0.5157902219  | -1.1101208425 | 0.6385923814  |
| C | 0.0031303908  | -0.6565826284 | 1.9535859675  |
| C | -0.5268452010 | -1.4817841175 | 2.9589284708  |
| C | -0.9692151979 | -0.9089852027 | 4.1181677773  |
| C | -0.8907830151 | 0.4874936339  | 4.2956492806  |
| C | -0.3754778397 | 1.3019529495  | 3.3234883595  |
| C | 0.0741147230  | 0.7090508254  | 2.1340201011  |
| O | 0.5746074365  | -2.2482105665 | 0.2675567209  |
| S | 0.8062931734  | 1.5644934444  | 0.7605394174  |
| H | 2.1812112773  | -0.9133581242 | -1.6527195805 |
| H | -0.6933245641 | 1.8999126149  | -1.5560638089 |
| H | -1.6438566091 | 2.2288678944  | -3.7669247783 |
| H | -1.2967016476 | 0.5333290685  | -5.5826633061 |
| H | -0.6197814590 | -1.7835201005 | -4.9544316254 |
| H | 0.0913955182  | -2.2072672198 | -2.5683567008 |
| H | -0.5726306251 | -2.5427753503 | 2.7972587924  |
| H | -1.3792069053 | -1.5181243880 | 4.9029743416  |
| H | -1.2439337900 | 0.9198245472  | 5.2147842563  |
| H | -0.3176281800 | 2.3654574841  | 3.4660493565  |

## CI5

|   |               |               |               |
|---|---------------|---------------|---------------|
| C | -0.0005906782 | -0.2931904375 | 0.4553063775  |
| C | -1.1674031847 | -0.6721122874 | -0.3150599705 |
| C | -2.4987766042 | -0.2607997079 | -0.0664393040 |
| C | -2.7895245388 | 0.5486996861  | 1.0462296606  |
| C | -4.0924896403 | 0.9238217756  | 1.2968701301  |
| C | -5.0982667679 | 0.5019289412  | 0.4379250880  |
| C | -4.8312921025 | -0.2943608619 | -0.6766143633 |
| C | -3.5372596910 | -0.6715208486 | -0.9303385772 |
| C | 0.6183552850  | 0.5102117309  | -0.4743967097 |
| C | 2.0782654292  | 0.5235175794  | -0.2938029791 |
| C | 3.0196844557  | 1.3390571635  | -0.9429282242 |
| C | 4.3615394264  | 1.1753454604  | -0.6535238425 |
| C | 4.7704540916  | 0.1975709925  | 0.2760361006  |
| C | 3.8460833272  | -0.6155466589 | 0.9082844821  |
| C | 2.4867832932  | -0.4517993790 | 0.5917409668  |
| O | -0.0598668080 | 0.9792220749  | -1.4277839559 |
| S | 1.1482194958  | -1.3752662781 | 1.2741315571  |
| H | -1.0605145600 | -1.3331243419 | -1.1688364885 |

|   |               |               |               |
|---|---------------|---------------|---------------|
| H | -1.9741418166 | 0.8559856288  | 1.6703816940  |
| H | -4.3295075791 | 1.5404551517  | 2.1429452730  |
| H | -6.1131900803 | 0.7982789831  | 0.6343990909  |
| H | -5.6308019928 | -0.5999681183 | -1.3244969960 |
| H | -3.3021122784 | -1.2774095611 | -1.7863174441 |
| H | 2.6797993137  | 2.0751020197  | -1.6479168330 |
| H | 5.0996522078  | 1.7925661608  | -1.1337159762 |
| H | 5.8170469541  | 0.0780146514  | 0.4940925141  |
| H | 4.1609720433  | -1.3624365196 | 1.6143157297  |

## CI6

|   |               |               |               |
|---|---------------|---------------|---------------|
| C | -0.0118983786 | -0.4553854458 | -0.0442829777 |
| C | -0.0379105914 | -0.9556915326 | -1.3020738541 |
| C | -0.0533650022 | -0.3749528251 | -2.6421046471 |
| C | -1.0563985219 | 0.5437684082  | -2.9911055028 |
| C | -1.1163987457 | 1.0675349106  | -4.2800634479 |
| C | -0.1842508274 | 0.6897071414  | -5.2414412481 |
| C | 0.8075710596  | -0.2281698677 | -4.8961372108 |
| C | 0.8692018269  | -0.7538642954 | -3.6254881625 |
| C | -0.6030967289 | -1.2024351074 | 1.1823405642  |
| C | -0.2776132619 | -0.4964031033 | 2.4360968912  |
| C | -0.6414533975 | -0.9223167979 | 3.7236423828  |
| C | -0.2866983170 | -0.1541953327 | 4.7974708159  |
| C | 0.4269922739  | 1.0446754590  | 4.6056885725  |
| C | 0.7833832865  | 1.4714387051  | 3.3532179654  |
| C | 0.4255716750  | 0.6755762556  | 2.2569253101  |
| O | -1.2207989137 | -2.2054360297 | 1.0741953407  |
| S | 0.7734118093  | 1.0643602278  | 0.5566533341  |
| H | 1.0770771284  | -0.9681048838 | -0.9046375858 |
| H | -1.7868455786 | 0.8381287219  | -2.2590163004 |
| H | -1.8920004654 | 1.7708502605  | -4.5272865414 |
| H | -0.2297169151 | 1.0946023031  | -6.2360966641 |
| H | 1.5329383076  | -0.5343195156 | -5.6292938865 |
| H | 1.6319873303  | -1.4733467957 | -3.3837501361 |
| H | -1.1904930930 | -1.8382483133 | 3.8395396696  |
| H | -0.5518746431 | -0.4580805847 | 5.7933348466  |
| H | 0.6969647527  | 1.6370008538  | 5.4613752974  |
| H | 1.3256959311  | 2.3883511846  | 3.2147861754  |

## CI7

|   |              |              |               |
|---|--------------|--------------|---------------|
| C | 1.0937631958 | 1.5327138331 | -1.7086613378 |
|---|--------------|--------------|---------------|

|   |               |               |               |
|---|---------------|---------------|---------------|
| C | 0.8043576943  | 1.8431215021  | -0.2855675266 |
| C | -0.2479907419 | 1.2103828206  | 0.3320388878  |
| C | -1.0693508674 | 0.2284715815  | -0.3854240287 |
| C | -2.3568231114 | -0.1164427608 | 0.1453419175  |
| C | -2.7977511501 | 0.4314347715  | 1.2873206277  |
| C | -1.9666493908 | 1.3514752561  | 2.0521908157  |
| C | -0.7594955724 | 1.7025828887  | 1.6133530784  |
| C | 0.0386276641  | 1.3201753433  | -2.5615353311 |
| C | 0.4722557687  | 0.7120263088  | -3.8220856573 |
| C | -0.3154522344 | 0.3750473856  | -4.9348277074 |
| C | 0.3000709017  | -0.1505397419 | -6.0574369953 |
| C | 1.6954289358  | -0.3337613567 | -6.0879326618 |
| C | 2.4772781375  | 0.0012910956  | -4.9942369626 |
| C | 1.8388120116  | 0.5149754867  | -3.8592491359 |
| O | -1.1598515597 | 1.4314503288  | -2.1506773977 |
| S | 2.6076100680  | 0.9827299390  | -2.3453614297 |
| H | 1.2382994577  | 2.7151645176  | 0.1697335158  |
| H | -0.5950272015 | -0.4746294329 | -1.0346611097 |
| H | -2.9549261858 | -0.8278755585 | -0.3933730642 |
| H | -3.7694157949 | 0.1773291522  | 1.6709585510  |
| H | -2.3484512063 | 1.7436451436  | 2.9773015611  |
| H | -0.1478672622 | 2.3926743216  | 2.1666957601  |
| H | -1.3777322784 | 0.5310167468  | -4.8994028617 |
| H | -0.2878237350 | -0.4181238510 | -6.9169495405 |
| H | 2.1600883073  | -0.7384403241 | -6.9690252241 |
| H | 3.5429049254  | -0.1370034999 | -5.0142057164 |
